# Supplementary material for: Building trust in deep learning-based immune response predictors with interpretable explanations
Source: PubMed Central journal article supplement (PMC10917751; doi:10.1038/s42003-024-05968-2), 2024-03-06
Supplement: 42003_2024_5968_MOESM1_ESM.pdf [file 42003_2024_5968_MOESM1_ESM.pdf]

# Supplementary Text

## Building Trust in Deep Learning-based Immune Response Predictors with Interpretable Explanations

Piyush Borole, Ajitha Rajan

### Supplementary Note 1: Introduction

In this document, we look at additional experiments that support the results in the main manuscript. Firstly, we look at additional benchmarking of the predictors by looking at a variant of the benchmark dataset and evaluate them on variety of metrics.

Furthermore, we show that explanations for alleles can also be generated using LIME [1] and SHAP [2] and global explanations can be formed by aggregation of attribution values. We also demonstrate that LIME and SHAP explanations are mostly correlated, and SHAP feature attribution values shows correlation while LIME attribution values are independent.

While BAAlaS provides an important alternative to resource intensive Alanine-scanning Mutagenesis [3] to identify peptide residues contributing to binding to MHC molecule, it suffers two major limitations. The first limitation is that the energy calculations BAAlaS does over the PDB structure of bound peptide-MHC allele molecule is seemingly affected by the resolution of the PDB structure. Here we demonstrate examples where difference in resolution marks a residue to be contributing to binding in one resolution while not contributing to binding in another resolution. The second major limitation is that BAAlaS calculates energies by replacing the residue in peptide with alanine. However, if the input peptide contains alanine residue, the contribution of this residue cannot be calculated by BAAlaS.

Next, we show the GibbsCluster [4] report of clustering input peptides for HLA-A\*02:01 used to test stability of the explanations generated by LIME and SHAP. We also provide supplementary tables reporting the effect size and p-values. Supplementary Data 4 and 6 reports effect size in terms of Pearson's  $r$  and Supplementary Tables 1-3 reports effect size using Cohen's  $d$ .

The quality of explanations depends on the choice of certain parameters. LIME and SHAP are perturbation based XAI techniques, meaning that they generate test samples by mutating the original input peptide to evaluate the predictor and generate an explanation. The number of test samples to be generated (or the number of times the model should be evaluated) is one of the parameters that can be passed to the XAI techniques. If the model is not evaluated sufficiently, the attribution values display high variance. This variance reduces as the number of mutated samples increases. To find the right number of mutated samples for reducing variance, we set up an evaluation where we generate explanations for a peptide by varying the number of mutated samples the XAI technique should produce.

To generate these mutated samples, LIME and SHAP relies on the training data used to train predictor. Here, we explore if there is any difference in explanations generated if we provide training data covering all peptides across alleles or training peptides specific to the MHC allele of interest. We test the validity of the explanations generated by providing these two training datasets.

We also look at the nature of these explanations and the congruence between the explanations generated by LIME and SHAP.

## 43 **Supplementary Note 2: Additional benchmarking of predictor performance**

44

45 In the main manuscript, we assessed performance of the predictors using the MHC-Bench  
46 dataset. However, as mentioned earlier, MHC-Bench contains Peptide-MHC pairs that were not  
47 seen during training, though the peptides themselves may have been part of the training data for  
48 the predictors. Here, we present additional analysis by excluding training peptides from the MHC-  
49 Bench dataset, creating a new dataset referred to as “MHC-Bench-v2”.

50 After removing training peptides, we observed that, for 36 MHC alleles, there were no  
51 binder peptides available. We excluded these MHC alleles from our analysis, as the calculation of  
52 AUROC and AUPRC scores is not possible with only the negative or non-binder class. The MHC-  
53 Bench-v2 dataset comprises of 79 alleles, 1,282,057 unique peptides, and 1,666,269 peptide-MHC  
54 combinations. We calculated AUROC and AUPRC scores per allele which are provided in  
55 Supplementary Data 7 and 8. The percentage of binding peptides per allele is reported in  
56 Supplementary Data 9. In Supplemental Figure S1a, the AUROC v1 scores represent the scores  
57 on the original MHC-Bench dataset, and AUROC v2 scores represent the scores on the MHC-  
58 Bench-v2. The performances appear to be comparable to the performance on the MHC-Bench. In  
59 Supplemental Figure S1b, the AUPRC v1 scores represent the scores on the original MHC-Bench  
60 dataset, and AUPRC v2 scores represent the scores on the MHC-Bench-v2. With AUPRC, there  
61 is a noticeable drop in performance. Nevertheless, the performance of the predictors is still  
62 comparable and not significantly different (Kruskal-Wallis p-value: 0.45, H-statistic: 4.67).

63 Additionally, considering that the threshold for HLA alleles varies [7], many predictors  
64 recommend using a percentile score for the classification of peptides into binders or non-binders.  
65 However, not all predictors provide the percentile score. Among our selected predictors,  
66 MHCfovea and NetMHCpan offer %Rank, whereas MHCflurry provides the percentile only for  
67 the final presentation score (referred to as MHCflurry-PS in our manuscript). TransPHLA does  
68 not provide %Rank (or percentile) for the peptides but a binding probability. This limitation  
69 hinders our comparison across all predictors. Nonetheless, we compare the performance of the  
70 four predictors based on %Rank (or percentile). We set 0.5% as the cut-off for binders, as  
71 recommended in the original publications of the predictors, and calculate the F1 score per allele  
72 (results in Supplementary Data 10). Supplemental Figure S1c shows the distribution of the F1  
73 score for the four predictors. We find that the performance of the predictors is comparable and not  
74 significantly different (Kruskal-Wallis p-value: 0.19, H-statistic: 4.73).

75 These two analyses indicate that the performances of the predictors are comparable across  
76 metrics and scoring methods.

77

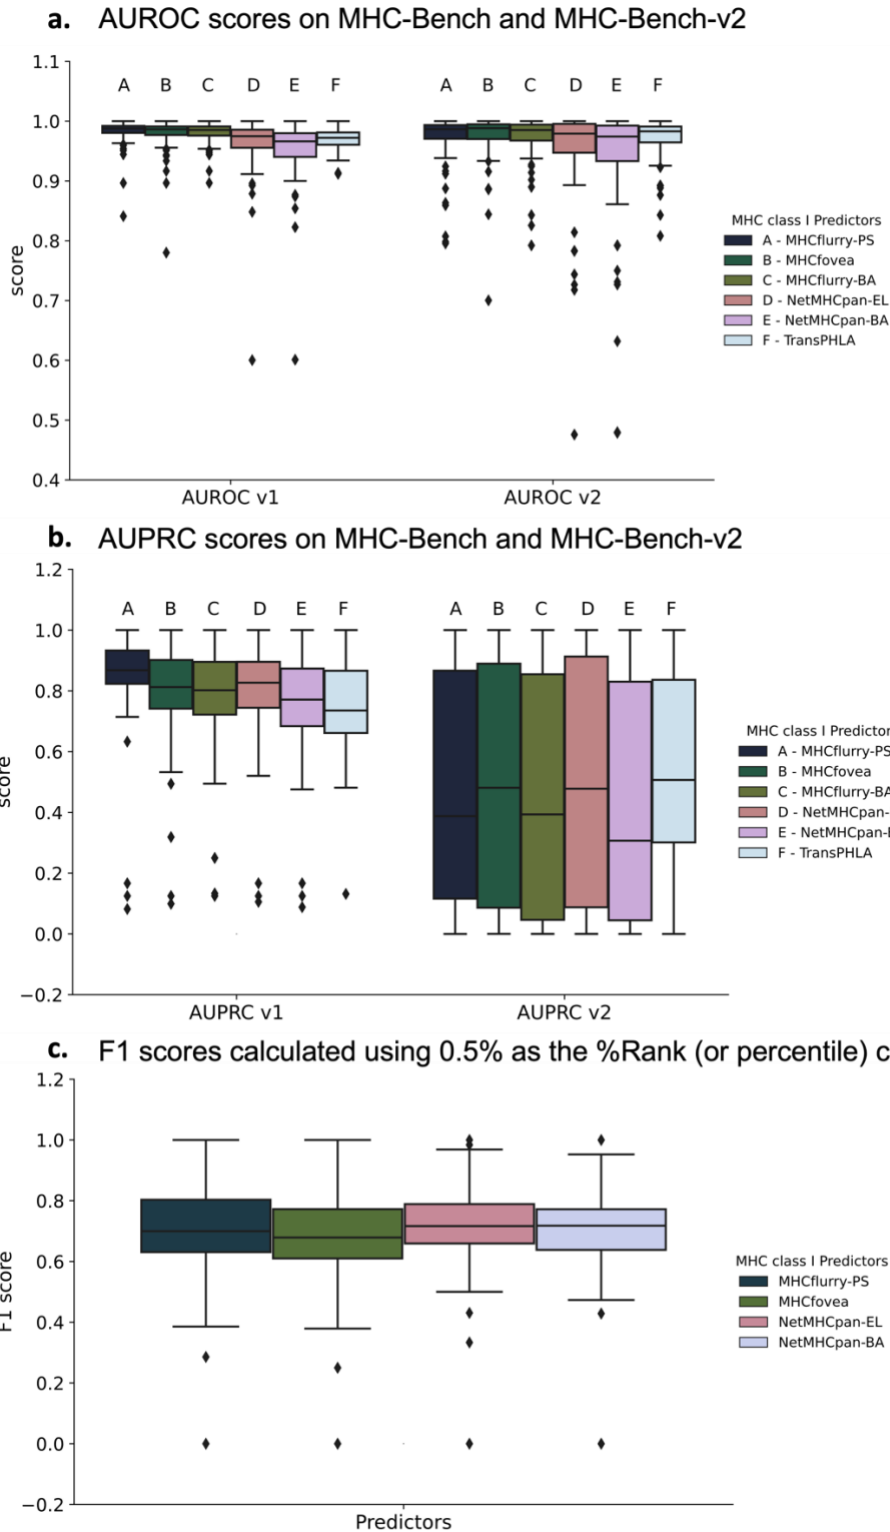

78  
79  
80  
81  
82

**Supplemental Figure S1:** Additional benchmarking results. **a)** AUROC scores for the predictors on MHC-Bench and MHC-Bench-v2. **b)** AUPRC scores for the predictors on MHC-Bench and MHC-Bench-v2. **c)** F1 scores for the predictors on MHC-Bench calculated using %Rank (or percentile in MHCflurry-PS).

83 **Supplementary Note 3: Explanations for MHC Allele (TransPHLA)**

84 Similarly, to peptide explanations, we can also generate explanations for alleles in MHC  
 85 class I predictors that take MHC molecules as input sequences. For example, TransPHLA accepts  
 86 both peptide and MHC molecule pseudo-sequences as input. A pseudo-sequence of an MHC  
 87 molecule consists of 34 residues forming the binding pocket of the MHC molecule's alpha subunit.  
 88 To generate explanations for MHC alleles, we use the same framework but modify it such that the  
 89 input peptide remains constant, while the MHC allele pseudo-sequence is perturbed. In  
 90 Supplemental Figure S2, we demonstrate that both LIME and SHAP can generate explanations for  
 91 the HLA-A\*02:01 allele sequence for TransPHLA.

**a. HLA-A\*02:01 BAaS results**

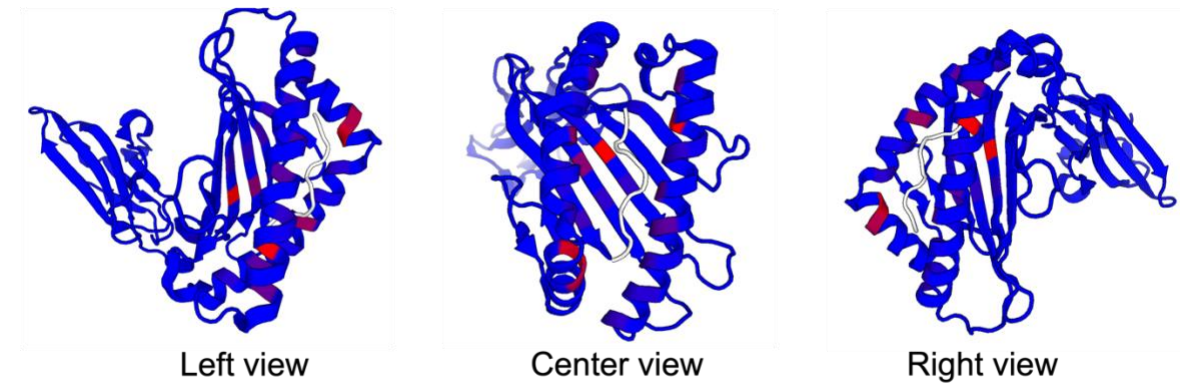

**b. BAaS  $\Delta\Delta G$**

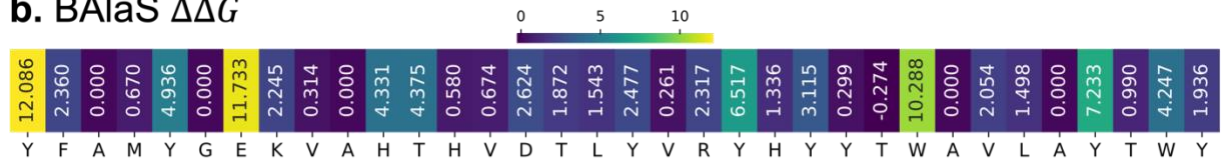

**c. SHAP**

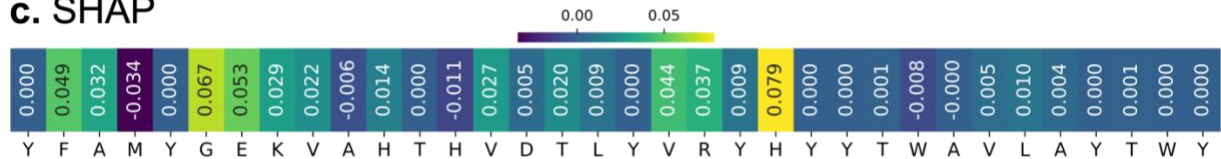

**d. LIME**

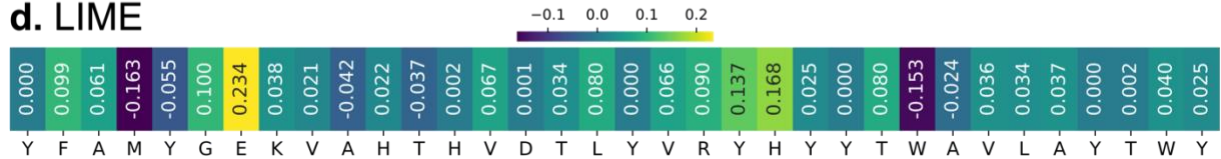

92 **Supplemental Figure S2.** Explanation for MHC allele HLA-A\*02:01 for TransPHLA. **a)** BAaS  
 93 result indicating allele residues contributing to binding (marked in red) from left, center, and right  
 94 view of the PDB structure. The molecule in white is the ligand peptide ITDQVPFSV. **b-d)**  $\Delta\Delta G$ ,  
 95 calculated using BAaS [3,5], for 34 pseudo-sequence positions of HLA-A\*02:01 (**b**) along with  
 96 SHAP (**c**) and LIME (**d**) explanations for those positions. Explanations for TransPHLA can be  
 97 generated as it accepts allele input as a sequence of amino acids.

92  
93  
94  
95  
96  
97  
98  
99  
100

101 **Supplementary Note 4: Global Explanations as Aggregation of Attribution Values**

102 Local instance-based explanations do not eliminate the need for global explanations; each  
 103 has its role. For example, global explanations help in understanding commonly presented peptide  
 104 patterns for a tumor, which can be utilized in the development of a cancer vaccine. It is essential  
 105 to note that local instance-based explanations can be aggregated to generate a global explanation.  
 106 Consider Supplemental Figure S3a, c, which displays the distribution of SHAP and LIME  
 107 attribution values for all amino acids at peptide positions P1, P2, P8, and P9 for HLA-A\*02:01 for  
 108 MHCflurry-PS. This distribution serves as a global explanation across all peptides for the MHC  
 109 allele HLA-A\*02:01. The heatmaps in Supplemental Figure S3b, d are produced by averaging all  
 110 the values from plots like Supplemental Figure S3a, c for all positions. We observe that the SHAP  
 111 attribution values for an amino acid have a wider range of values, whereas LIME attribution values  
 112 for the corresponding amino acid tend to have a very narrow range of values. This difference could  
 113 explain why LIME produces more stable and consistent explanations than SHAP.

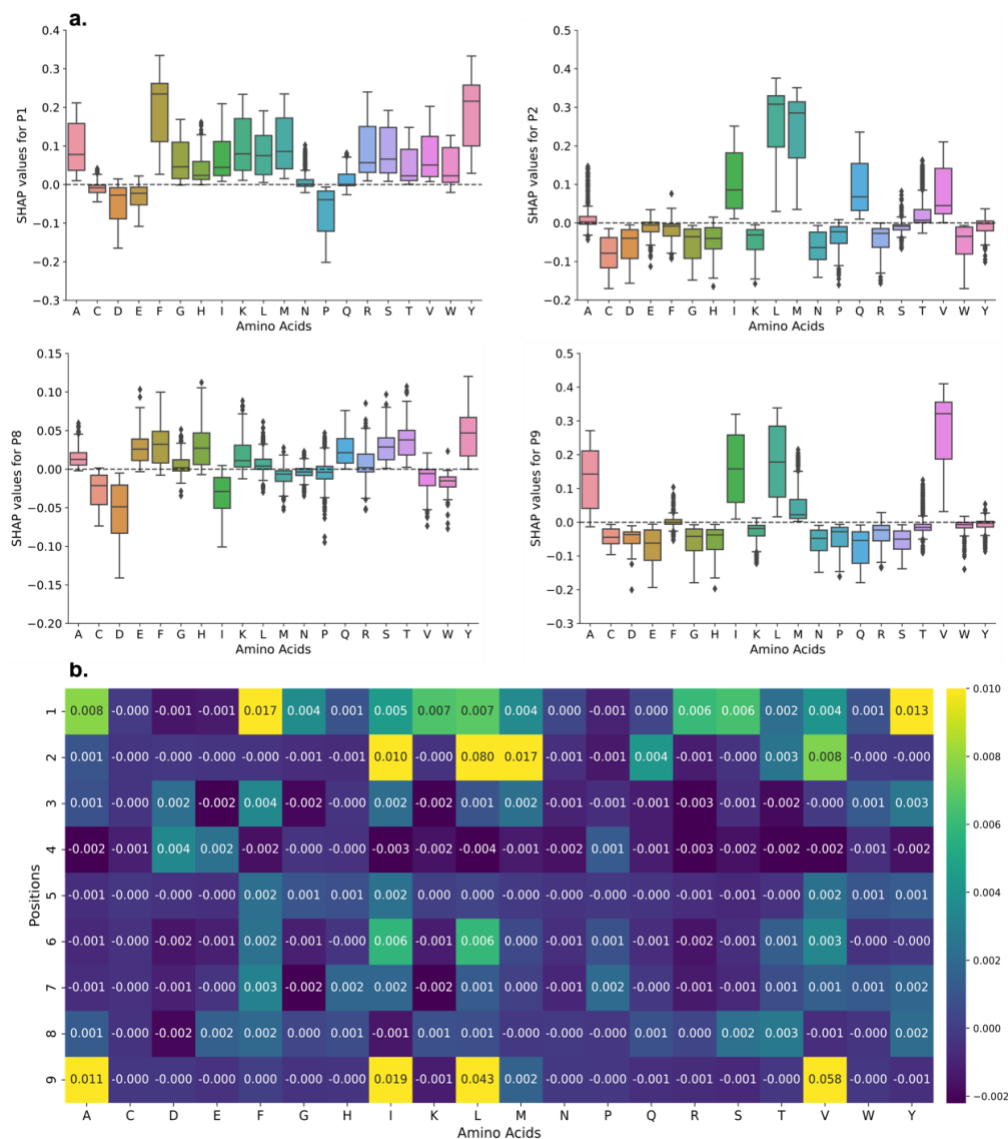

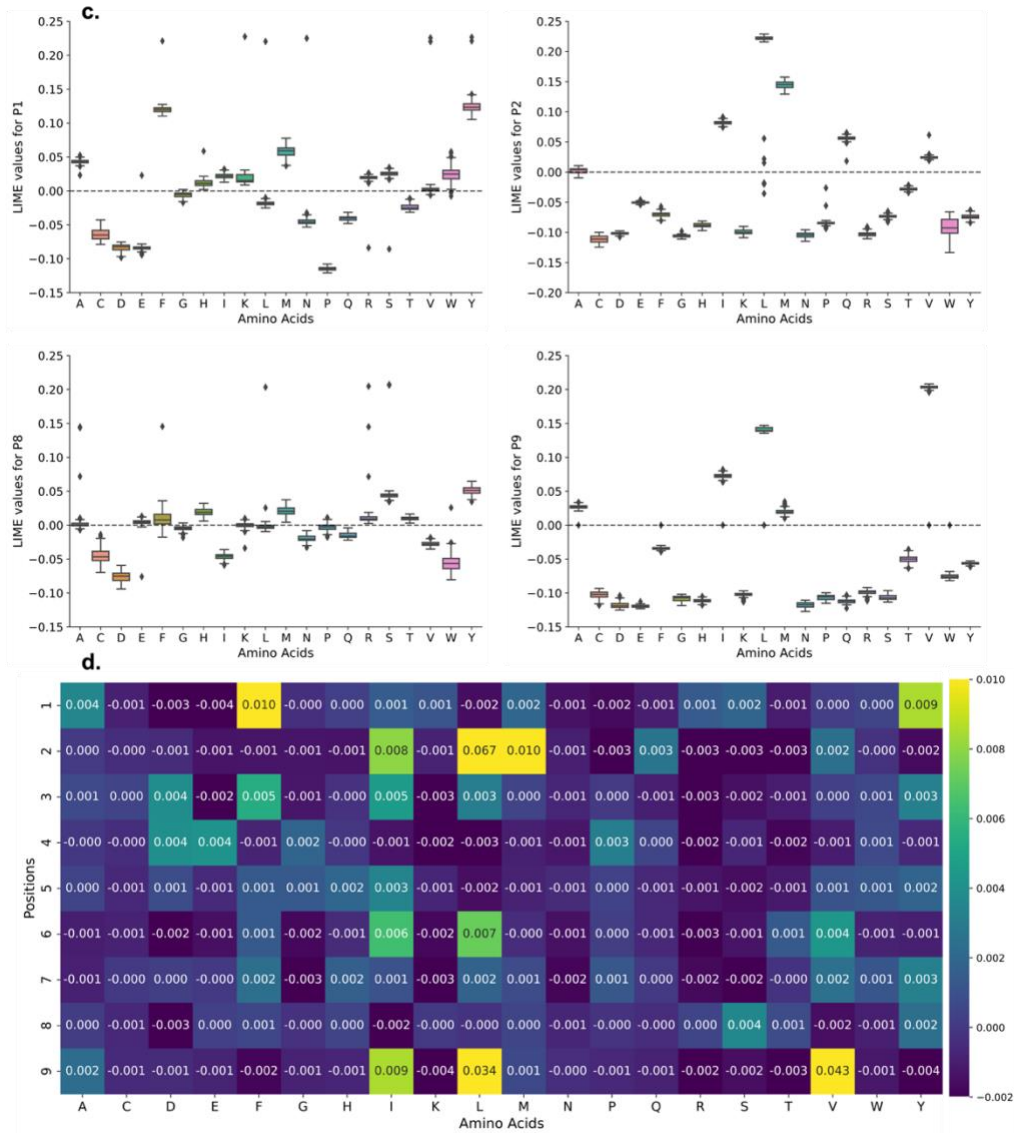

115  
 116 **Supplemental Figure S3.** Aggregation of SHAP and LIME attribution values to form global  
 117 explanation. **a)** SHAP attribution values distribution for MHC allele HLA-A\*02:01 for all amino  
 118 acids at N- and C- terminus (P1, P2, P8 and P9) for peptide. **b)** Heatmap of average SHAP values  
 119 for all amino acids at all peptide positions (P1-P9) for HLA-A\*02:01. **c)** LIME attribution values  
 120 distribution for MHC allele HLA-A\*02:01 for all amino acids at N- and C- terminus (P1, P2, P8  
 121 and P9) for peptide. **d)** Heatmap of average LIME values for all amino acids at all peptide positions  
 122 (P1-P9) for HLA-A\*02:01. SHAP attribution values for an amino acid tends to have wide  
 123 distribution compared to corresponding LIME attribution values.



124 **Supplementary Note 5: Limitation of BAaS**

125 BAaS [3,5] offers a cost-effective alternative to the expensive Alanine-scanning  
 126 mutagenesis [3] for calculating the free energy of interaction ( $\Delta\Delta G$ ) from the PDB structure of a  
 127 peptide ligand bound to an MHC molecule. This  $\Delta\Delta G$  can help identify peptide residues  
 128 contributing to binding. However, BAaS has two main limitations:  $\Delta\Delta G$  calculations are  
 129 influenced by the resolution of the PDB structure, and the contribution of alanine residues cannot  
 130 be determined. Supplemental Figure S4 illustrates the first limitation, where for the same peptide-  
 131 MHC allele pair, one PDB structure highlight certain residues as 'hot' residues, while another  
 132 structure may not. In Supplemental Figure S4b, it is evident that in structure 5D2L, residue N has  
 133 a negative  $\Delta\Delta G$ , whereas for the same peptide-MHC allele pair in structure 3GSO, residue N has  
 134 a neutral effect. The second limitation is demonstrated in Supplemental Figure S5, where the  
 135 residue at peptide position P2 in both structures is alanine. Although P2 is an anchor residue  
 136 appropriately highlighted by the SHAP explanation, BAaS is unable to quantify the contribution  
 137 of this position.

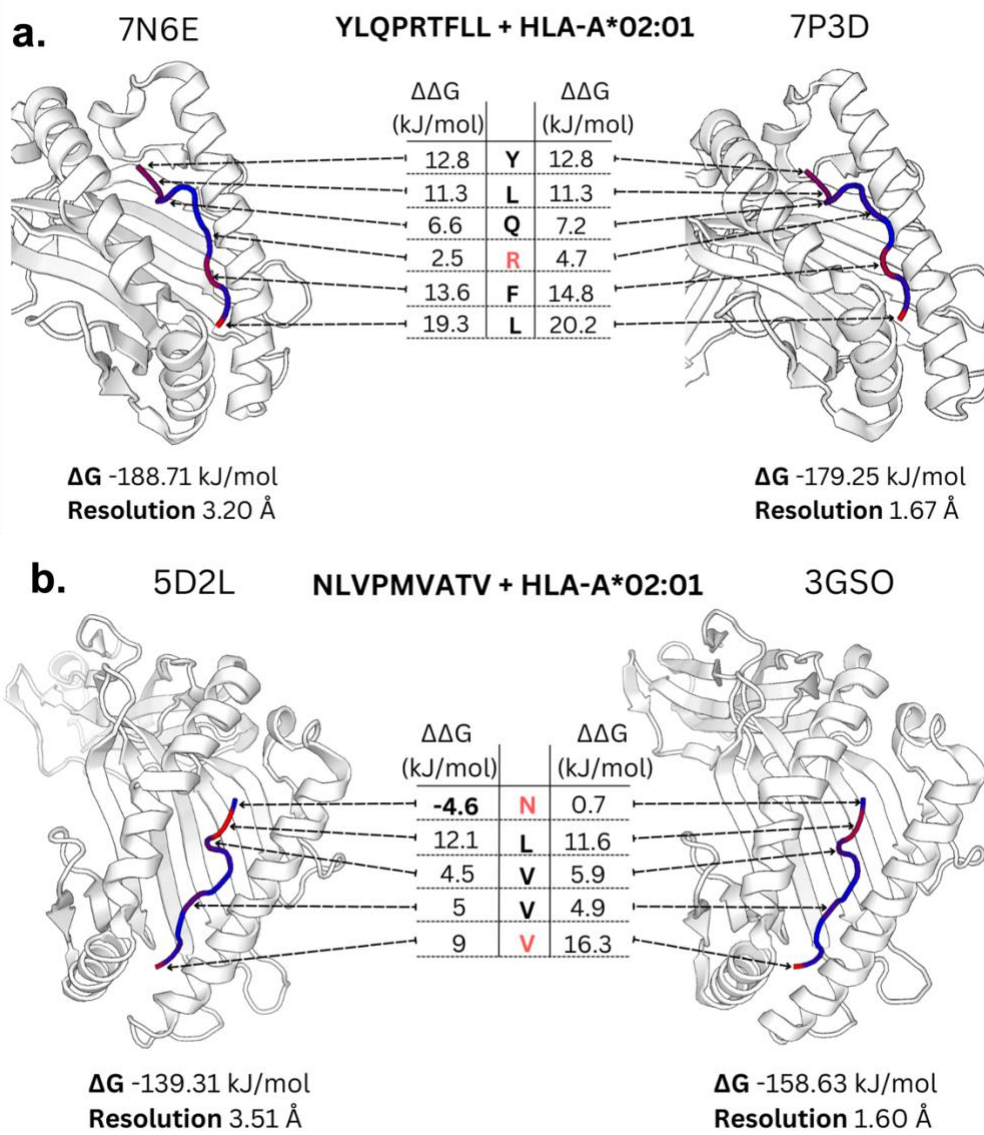

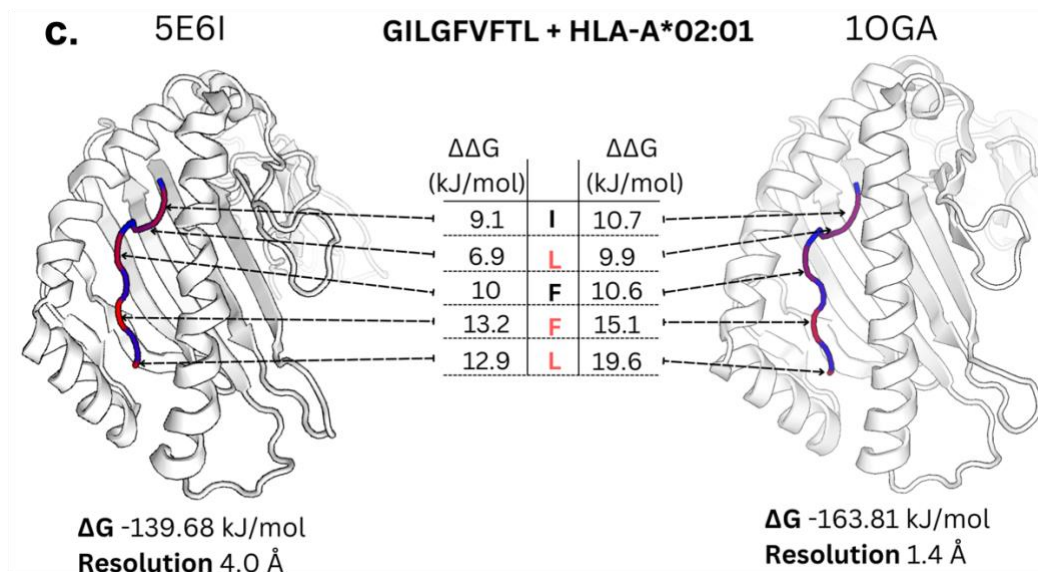

139

140 **Supplemental Figure S4.** Impact of resolution of PDB structure on  $\Delta\Delta G$  calculation. In all **a**, **b**  
 141 and **c**, there are two PDB structure of different resolutions showing peptide bound to MHC allele.  
 142 The residues that have relatively large difference in  $\Delta\Delta G$  are highlighted in red. The difference in  
 143 free energy ( $\Delta G$ ) due to difference in resolution can be more than 20 kJ/mol. In **a**, residue R is not  
 144 highlighted as 'hot' residue in coarser resolution PDB structure whereas for 7P3D,  $\Delta\Delta G >$   
 145 4.18 kJ/mol indicating that it is contributing to binding. In **b**, we see that the residue N have  
 146 negative  $\Delta\Delta G$  for PDB structure 5D2L whereas for the finer PDB structure 3GSO, the same residue  
 147 has no impact. The peptide-HLA models are created by BAaS online.



### a. AAGIGILTV + HLA-A\*02:01

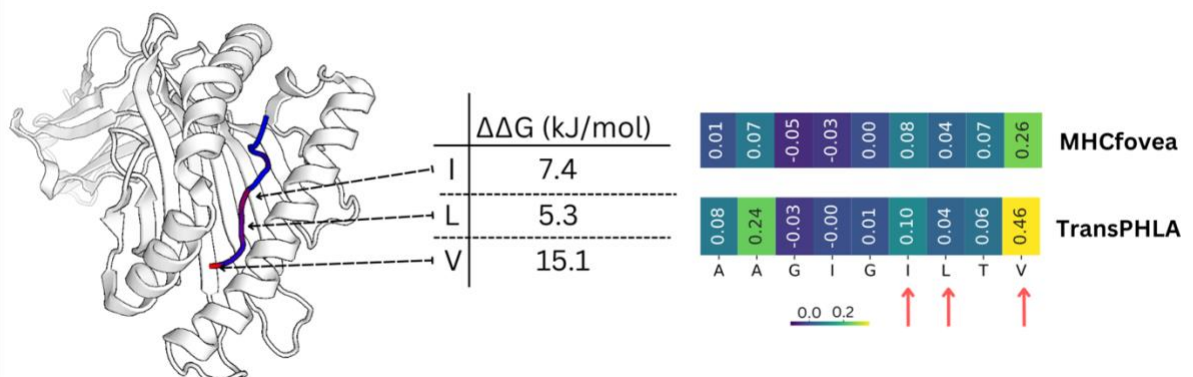

### b. LAGIGILTV + HLA-A\*02:01

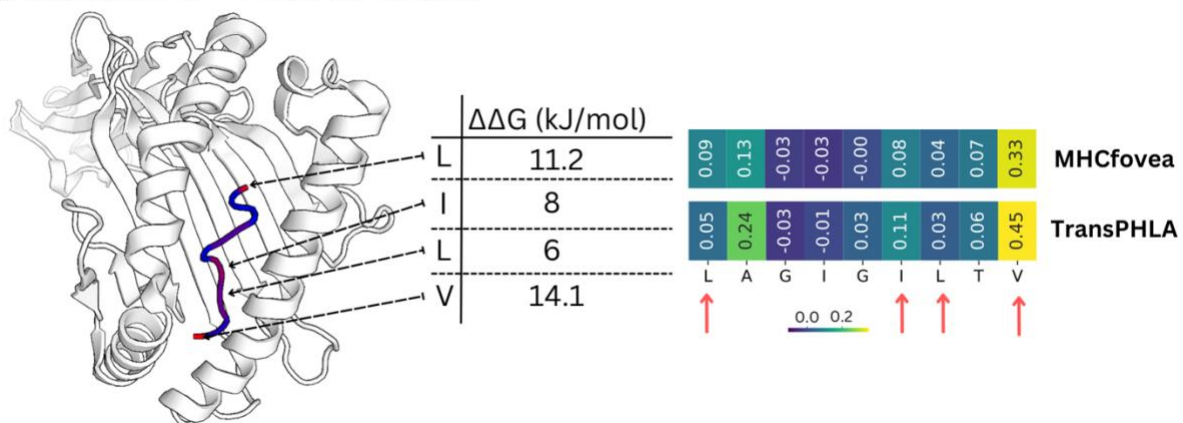

148  
 149 **Supplemental Figure S5.** Additional examples of comparison between BA<sub>la</sub>S  $\Delta\Delta G$  and SHAP  
 150 explanations and demonstration of limitation of BA<sub>la</sub>S. Here, peptides AAGIGILTV (**a**) and  
 151 LAGIGILTV (**b**) are both binding peptides to MHC allele HLA-A\*02:01 with only first amino  
 152 acid difference. **a**) The BA<sub>la</sub>S identifies that for peptide AAGIGILTV, peptide positions P6, P7  
 153 and P9 are important for the binding. The two heatmaps are SHAP explanations for MHCfovea  
 154 and TransPHLA which correctly classified the peptide as binder. The explanations reveal that  
 155 while P9 is important position, they do not place high importance to other important positions P6  
 156 and P7. **b**) For peptide LAGIGILTV, P1, P6, P7 and P9 are important residues contributing to the  
 157 binding. The two heatmaps are SHAP explanations for MHCfovea and TransPHLA which  
 158 correctly classified the peptide as binder. The explanations reveal that while P9 is important  
 159 residue, P6 and P7 are not considered highly important for classification even though they  
 160 contribute strongly to binding. We see that in (**b**) 'L' has very high ( $\Delta\Delta G$ ) indicating the  
 161 importance of the position. However, neither of the models highlights this to be an important  
 162 position. TransPHLA indicates P2 as important position contributing to binding which is not  
 163 indicated by BA<sub>la</sub>S. This is important as P2 is one of the primary anchor positions. However, as  
 164 BA<sub>la</sub>S replaces amino acids with 'A' to calculate ( $\Delta\Delta G$ ), we cannot calculate the contribution of  
 165 'A' towards binding (For example at position P2 in LAGIGILTV). The peptide-HLA models are  
 166 created by BA<sub>la</sub>S online

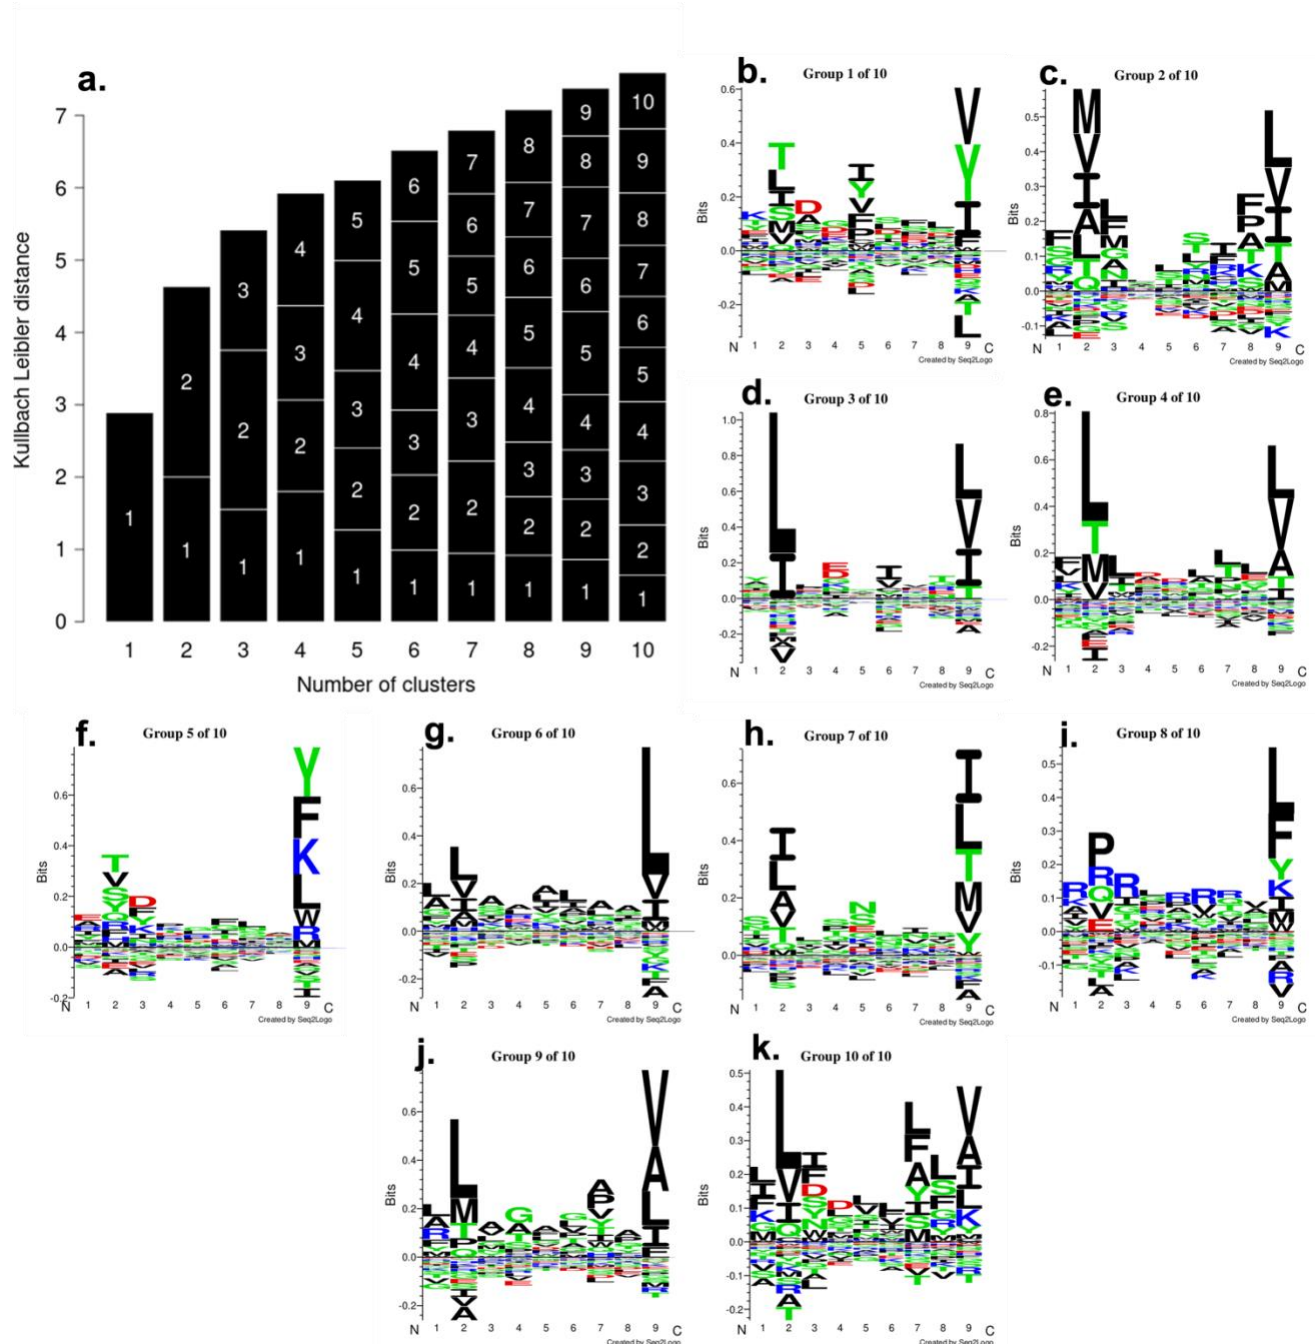

168

169 **Supplemental Figure S6.** GibbsCluster [4] report for MHC allele HLA-A\*02:01 peptides. **a)**

170 Kullbach-Leibler Distance (KLD) when peptides are clustered into 1-10 clusters. The KLD

171 increases with the number of clusters. The number of clusters with maximum average KLD (Here

172 10 clusters) is recommended as best clustering result [4]. The length of labelled section in each

173 column represents the size of that cluster. For 10 clusters, all the clusters contain nearly the same

174 number of peptides as seen by similar length of sections. **b-k)** The motifs of the peptides present

175 in 10 clusters.

176

177

## 178 Supplementary Note 6: Convergence of Explanations

179 To generate explanations, LIME produces perturbed samples where it replaces an amino  
180 acid with another amino acid sampled from a distribution derived from the training peptide dataset.  
181 Similarly, SHAP evaluates the model by replacing the amino acid in the test peptide with an amino  
182 acid from the training peptide dataset. As the number of test samples generated by LIME and  
183 SHAP increases, the variance of the attribution value decreases. To test this, we generated  
184 explanations for 20 peptides (10 binders, 10 non-binders) for HLA-A\*02:01 using LIME and  
185 SHAP. We considered explanations generated with 25,000 perturbed samples as the baseline.  
186 Next, we generated explanations for all 20 peptides using 1,000 – 25,000 perturbed samples, and  
187 the Euclidean distance is calculated from the baseline. In Supplemental Figure S7, we see that the  
188 Euclidean distance approaches zero for SHAP (Supplemental Figure S7a) rapidly as the number  
189 of perturbed samples increases until 10,000 samples. While for LIME explanations, Euclidean  
190 distance initially drops rapidly until 7,500 perturbed samples, after which the value plateaus and  
191 does not approach zero (Supplemental Figure S7b). In Supplemental Figure S7, each dot represents  
192 the average Euclidean distance calculated for 20 peptide explanations. The errorbar indicates the  
193 variance in Euclidean distance, and as the number of perturbed samples increases, the errorbar  
194 reduces, indicating a reduction in variance in both LIME and SHAP attribution values.  
195

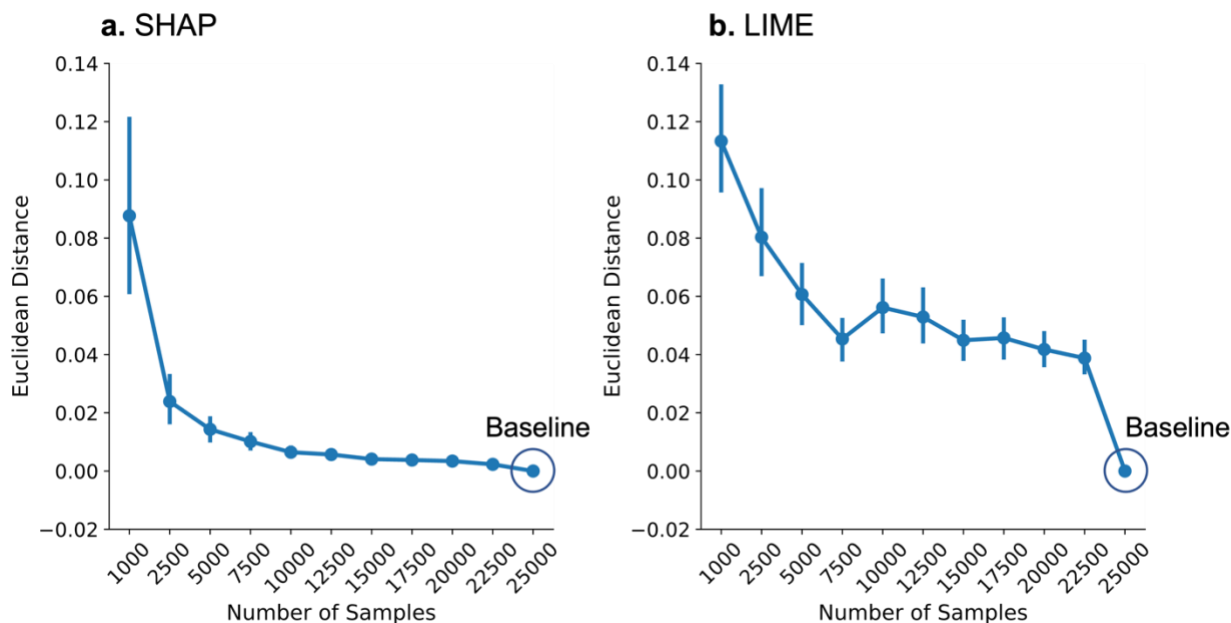

196  
197

198 **Supplemental Figure S7.** Convergence of explanations. LIME and SHAP generate explanations  
199 by evaluating the model over perturbed samples. The attribution values start to converge from  
200 10,000 samples for SHAP (a) and 7500 samples for LIME (b). The SHAP attribution values comes  
201 very close to baseline (attribution values generated using 25,000 samples) but LIME attribution  
202 values do not eventually converge to baseline. However, as the number of samples increase, the  
203 error bar size reduces in both SHAP and LIME.

204 **Supplementary Note 7: Impact of Training Data**

205 Since generating explanations requires training data, we also explored whether the  
206 explanation changes if we provide the entire training data across all alleles or just training data  
207 specific to the allele of interest. From our PDB dataset of bound peptide-MHC structures, we  
208 selected structures for alleles HLA-A\*02:01, HLA-B\*07:02, and HLA-B\*35:01. These alleles  
209 have many peptides-MHC bound PDB structures (105, 9, and 11 structures for HLA-A\*02:01,  
210 HLA-B\*07:02, and HLA-B\*35:01, respectively). We used the  $\Delta\Delta G$  for peptide positions obtained  
211 from BAaS for these structures and generated LIME and SHAP explanations using the ‘All  
212 training peptides’ dataset and ‘Allele-specific peptides’ dataset. For each structure, the Pearson  
213 correlation coefficient between  $\Delta\Delta G$  and explanations is calculated and plotted in Supplemental  
214 Figure S8a, b for SHAP and LIME, respectively. We found that SHAP explanations generated  
215 using ‘Allele-specific peptides’ are similar to explanations generated using ‘All training peptides’  
216 and are no more or less correlated to the BAaS  $\Delta\Delta G$ . On the contrary, we observed that limiting  
217 training data to allele-specific peptides could be detrimental to the accuracy of the LIME  
218 explanations than the explanations generated using ‘All training peptides’.

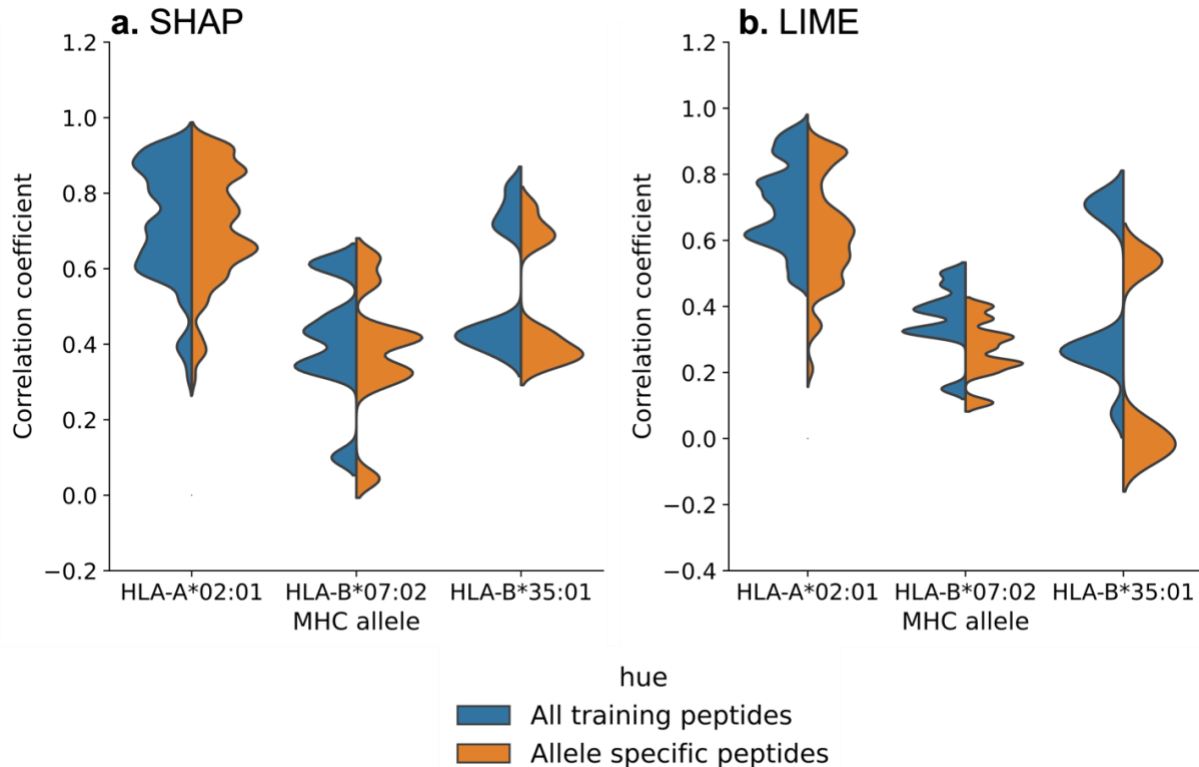

219 **Supplemental Figure S8.** Impact of limiting training data on SHAP and LIME explanations.  
220 Validity is tested for two sets of explanations generated using ‘All training peptides’ and ‘Allele  
221 specific peptides’ against  $\Delta\Delta G$  values. **a)** SHAP explanations are not affected either positively or  
222 negatively by limiting training data to alleles specific peptides. This is indicated by similar  
223 distribution of correlation coefficient between  $\Delta\Delta G$  and attribution values generated from two  
224 training datasets. **b)** On the contrary, LIME explanations become unreliable when training data is  
225 limited to allele specific peptides as seen by difference in correlation coefficient distribution  
226 between the two training datasets. The correlation coefficients are reported in Supplementary Data  
227 11.  
228

229 **Supplementary Note 8: Properties of Explanations**

230 LIME and SHAP produce stable and consistent explanations for MHC class I predictors  
231 which mostly agree with the independently derived important positions using BAlaS. We wanted  
232 to further explore qualities and features of the explanations. First, we explored if the SHAP and  
233 LIME explanation for an MHC class I predictor (MHCflurry-PS) agree with each other.  
234 Supplemental Figure S9a shows distribution of correlation coefficient between LIME and SHAP  
235 for 9 MHC class I allele. We find that the LIME and SHAP explanations are highly correlated. We  
236 also explored if the attribution values of explanations are dependent on each other. Supplemental  
237 Figure S9b are correlation heatmaps of SHAP/LIME attribution values of peptide positions. For  
238 all 3 alleles, SHAP attribution values interdependent (especially for anchor positions P1, P2 and  
239 P9) while LIME attribution values were independent. This is possible when SHAP produces test  
240 samples from a distribution that has dependent features [9] whereas LIME samples independently  
241 for each peptide position from the amino acid frequency generated from training data.

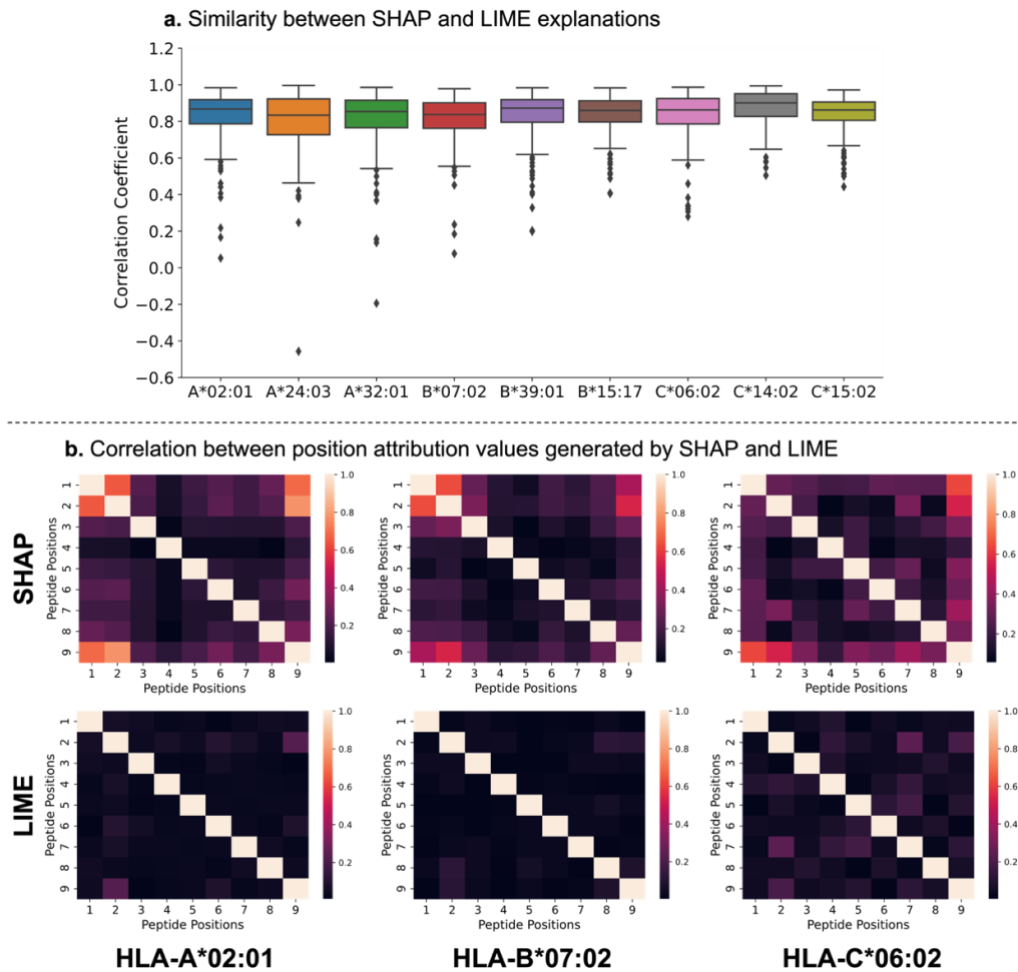

242  
243 **Supplemental Figure S9.** Comparison of explanations produced by SHAP and LIME for same  
244 input samples and correlation between the attribution values for peptide positions. **a)** The LIME  
245 and SHAP explanations are highly correlated for the nine MHC class I alleles. **b)** Correlation  
246 heatmaps for attribution values among all peptide positions indicates that SHAP attribution values  
247 can be correlated whereas LIME attribution values tend to be independent. The correlation  
248 coefficient values are reported in Supplementary Data 12.

249 **Supplementary Tables**

250 Cohen's d is calculated as follows:

251 
$$d = \frac{\bar{x}_1 - \bar{x}_2}{s}$$

252 
$$s = \sqrt{\frac{(n_1 - 1)s_1^2 + (n_2 - 1)s_2^2}{n_1 + n_2 - 2}}$$

253 Where,  $\bar{x}_1$  &  $\bar{x}_2$  are mean of the two group,  $s$  is pool standard deviation,  $s_1^2$  and  $s_2^2$  are variances  
 254 of two groups and  $n_1$  and  $n_2$  are number of samples in the groups.

256 **Supplementary Table 1:** Kruskal Wallis test results: p-values, H-statistic and effect size Cohen's  
 257 d for SHAP explanations generated for testing Consistency.

| HLA         | p-value   | H-statistic | Cohen's d |
|-------------|-----------|-------------|-----------|
| HLA-A*02:01 | 1.067e-24 | 105.267     | 1.369     |
| HLA-A*24:03 | 2.709e-18 | 76.090      | 0.944     |
| HLA-A*32:01 | 8.583e-34 | 146.822     | 1.613     |
| HLA-B*07:02 | 2.235e-33 | 144.920     | 1.443     |
| HLA-B*39:01 | 6.167e-10 | 38.267      | 0.741     |
| HLA-B*15:17 | 9.774e-26 | 110.004     | 1.177     |
| HLA-C*06:02 | 4.157e-40 | 175.725     | 1.717     |
| HLA-C*14:02 | 2.302e-56 | 250.240     | 2.196     |
| HLA-C*15:02 | 1.143e-39 | 173.713     | 1.888     |

258 **Supplementary Table 2:** Kruskal Wallis test results: p-values, H-statistic and effect size Cohen's  
 259 d for LIME explanations generated for testing Consistency.

| HLA         | p-value   | H-statistic | Cohen's d |
|-------------|-----------|-------------|-----------|
| HLA-A*02:01 | 4.856e-65 | 290.046     | 2.754     |
| HLA-A*24:03 | 3.792e-26 | 111.881     | 1.174     |
| HLA-A*32:01 | 1.091e-48 | 215.040     | 1.770     |
| HLA-B*07:02 | 1.027e-57 | 256.435     | 1.364     |
| HLA-B*39:01 | 2.366e-53 | 236.425     | 1.565     |
| HLA-B*15:17 | 4.785e-57 | 253.369     | 2.019     |
| HLA-C*06:02 | 4.284e-57 | 253.589     | 2.273     |
| HLA-C*14:02 | 3.016e-62 | 277.228     | 2.663     |
| HLA-C*15:02 | 1.057e-61 | 274.728     | 2.792     |



260  
261

**Supplementary Table 3:** Kruskal Wallis test results: p-values, H-statistic and effect size Cohen's d for SHAP and LIME explanations generated for testing Stability.

| Pairs   | Order                                       | SHAP       |          |           | LIME       |         |           |
|---------|---------------------------------------------|------------|----------|-----------|------------|---------|-----------|
|         |                                             | p-val.     | H        | Cohen's d | p-val.     | H       | Cohen's d |
| c2, c5  | Intracluster <sub>L</sub><br>- Intercluster | 1.552e-18  | 365.819  | 0.842     | 9.022e-29  | 123.863 | 0.487     |
|         | Intracluster <sub>R</sub><br>- Intercluster | 0.964      | 0.001    | 0.022     | 1.231e-09  | 36.918  | 0.283     |
| c3, c5  | Intracluster <sub>L</sub><br>- Intercluster | 1.245e-145 | 660.362  | 1.014     | 1.302e-125 | 568.320 | 0.854     |
|         | Intracluster <sub>R</sub><br>- Intercluster | 5.611e-07  | 25.041   | 0.232     | 4.379e-77  | 345.342 | 0.869     |
| c5, c6  | Intracluster <sub>L</sub><br>- Intercluster | 0.119      | 2.425    | 0.077     | 1.104e-38  | 169.202 | 0.463     |
|         | Intracluster <sub>R</sub><br>- Intercluster | 3.758e-199 | 906.517  | 0.757     | 1.129e-87  | 393.974 | 0.470     |
| c5, c9  | Intracluster <sub>L</sub><br>- Intercluster | 2.728e-09  | 35.368   | 0.241     | 1.878e-87  | 392.958 | 0.723     |
|         | Intracluster <sub>R</sub><br>- Intercluster | 0.0        | 1470.400 | 0.847     | 4.420e-167 | 759.004 | 0.632     |
| c5, c10 | Intracluster <sub>L</sub><br>- Intercluster | 0.064      | 3.415    | 0.099     | 3.654e-56  | 249.319 | 0.571     |
|         | Intracluster <sub>R</sub><br>- Intercluster | 1.431e-133 | 604.910  | 0.581     | 5.690e-24  | 101.951 | 0.259     |
| c3, c8  | Intracluster <sub>L</sub><br>- Intercluster | 1.424e-80  | 361.358  | 1.077     | 7.986e-57  | 252.348 | 0.819     |
|         | Intracluster <sub>R</sub><br>- Intercluster | 1.152e-05  | 19.239   | 0.292     | 6.720e-21  | 87.94   | 0.654     |

262 **Supplementary References**

263

264 1. Ribeiro, M.T., Singh, S., Guestrin, C.: “why should I trust you?”: Explain-  
265 ing the predictions of any classifier. In: Proceedings of the 22nd ACM  
266 SIGKDD International Conference on Knowledge Discovery and Data  
267 Mining, San Francisco, CA, USA, August 13-17, 2016, pp. 1135–1144  
268 (2016)

269 2. Lundberg, S.M., Lee, S.-I.: A unified approach to interpreting model  
270 predictions. *Advances in neural information processing systems* **30** (2017)

271 3. Ibarra, A.A., Bartlett, G.J., Hegedus, Z., Dutt, S., Hobor, F., Horner,  
272 K.A., Hetherington, K., Spence, K., Nelson, A., Edwards, T.A., et al.:  
273 Predicting and experimentally validating hot-spot residues at protein–  
274 protein interfaces. *ACS chemical biology* **14**(10), 2252–2263 (2019)

275 4. Andreatta, M., Alvarez, B., Nielsen, M.: Gibbscluster: unsupervised clus-  
276 tering and alignment of peptide sequences. *Nucleic acids research* **45**(W1),  
277 458–463 (2017)

278 5. Wood, C. W., Ibarra, A. A., Bartlett, G. J., Wilson, A. J., Woolfson, D. N., & Sessions, R.  
279 B. (2020). BAlaS: fast, interactive and accessible computational alanine-scanning using  
280 BudeAlaScan. *Bioinformatics*, **36**(9), 2917-2919.

281 6. Cunningham, B. C., & Wells, J. A. (1989). High-resolution epitope mapping of hGH-  
282 receptor interactions by alanine-scanning mutagenesis. *Science*, **244**(4908), 1081-1085.

283 7. Reardon, B., Koşaloğlu-Yalçın, Z., Paul, S., Peters, B. and Sette, A., 2021. Allele-specific  
284 thresholds of eluted ligands for T-cell epitope prediction. *Molecular & Cellular*  
285 *Proteomics*, **20**.

286 8. Aas, K., Jullum, M., & Løland, A. (2021). Explaining individual predictions when features  
287 are dependent: More accurate approximations to Shapley values. *Artificial*  
288 *Intelligence*, **298**, 103502.

289
