# Supplementary material for: Building trust in deep learning-based immune response predictors with interpretable explanations
Source: PubMed Central journal article supplement (PMC10917751; doi:10.1038/s42003-024-05968-2), 2024-03-06
Supplement: 42003_2024_5968_MOESM2_ESM.pdf [file 42003_2024_5968_MOESM2_ESM.pdf]

## Description of Additional Supplementary Files

**File name:** Supplementary Data 1

**Description:** AUROC scores per allele for all investigated MHC class I predictors on MHC-Bench.

**File name:** Supplementary Data 2

**Description:** AUPRC scores per allele for all the investigate MHC class I predictors on MHC-Bench.

**File name:** Supplementary Data 3

**Description:** Percent binding peptide-MHC pairs per allele for MHC-Bench.

**File name:** Supplementary Data 4

**Description:** Pearson r (correlation coefficient) between SHAP/ LIME explanations and  $\Delta\Delta G$ . Values plotted in Figure 5b of the main article.

**File name:** Supplementary Data 5

**Description:** PDB structures list used to generate ground truth using BalaS.

**File name:** Supplementary Data 6

**Description:** Pearson r (Correlation coefficient) for SHAP /LIME explanations for testing consistency. Values plotted in Figure 6c of the main article.

**File name:** Supplementary Data 7

**Description:** AUROC scores per allele for all investigated MHC class I predictors on MHC-Bench-v2.

**File name:** Supplementary Data 8

**Description:** AUPRC scores per allele for all the investigate MHC class I predictors on MHC-Bench-v2.

**File name:** Supplementary Data 9

**Description:** Percent binding peptide-MHC pairs per allele for MHC-Bench-v2.

**File name:** Supplementary Data 10

**Description:** F1 scores per allele for all investigated MHC class I predictors.

**File name:** Supplementary Data 11

**Description:** Pearson r (Correlation Coefficient) between LIME/SHAP explanations generated using all training peptides and allele specific peptides and corresponding  $\Delta\Delta G$ . Values plotted in Supplemental Figure S8.

**File name:** Supplementary Data 12

**Description:** Pearson r (Correlation coefficient) between SHAP and LIME explanations. Values plotted in Supplemental Figure S9a.
